# Supplementary material
Source: publisher figshare collection journal article supplement (https://gsajournals.figshare.com/ndownloader/files/23858477)
Supplement: Supplementary file 1 [file 23858477]

## Sheet: Sheet1
Data type	Experimental species	Symbol/name used in publication	Source – public	Source -- published	Source – unpublished	Identifiers	New reagent	Comments
Data type (mandatory) Duplicate rows as needed. Order is flexible, but row titles must be preserved.	Experimental species (mandatory, "NA" okay)	Symbol/name used in publication (mandatory)	Source – public [stock center; company, data repository] (one of D,E,F mandatory)	Source -- published [PMID or 'this paper'] (one of D,E,F mandatory)	Source – unpublished [description, incl. lab of origin] (one of D,E,F mandatory)	Identifiers [format as ID_source:identifier] Separate multiple entries with semi-colon, space	New reagent (mandatory for new entities) Description, progenitor(s)	Comments (optional) Genotypes, purpose of reagent, additional information
gene (source not applicable)	D. melanogaster	nebulosa (nebu)	NA	NA	NA	FLYB: FBgn0036316		CG10960
gene (source not applicable)	D. melanogaster	CG5003	NA	NA	NA	FLYB: FBgn0039554
gene (source not applicable)	D. melanogaster	CG7777	NA	NA	NA	FLYB: FBgn0033635
strain, genetic strain	D. melanogaster	WT: Oregon R			Orr-Weaver Lab
genetic reagent (in whole organism)	D. melanogaster	matα4-GAL, UAS-Dicer2			Orr-Weaver Lab
genetic reagent (in whole organism)	D. melanogaster	H2Av-GFP	Bloomington Drosophila Stock Center			BDSC Cat# 24163		w[*]; P{w[+mC]=His2Av-EGFP.C}2/SM6a
genetic reagent (in whole organism)	D. melanogaster	vasa-Cas9	Bloomington Drosophila Stock Center			BDSC Cat# 51323		y[1] M{RFP[3xP3.PB] GFP[E.3xP3]=vas-Cas9}ZH-2A w[1118]/FM7c
genetic reagent (in whole organism)	D. melanogaster	Df(3L)ED4483 (nebu genomic deficiency)	Bloomington Drosophila Stock Center			BDSC Cat# 8072		w[1118]; Df(3L)ED4486, P{w[+mW.Scer\FRT.hs3]=3'.RS5+3.3'}ED4486/TM6C, cu[1] Sb[1]
genetic reagent (in whole organism)	D. melanogaster	PBac{WH}f01095	Harvard Exelixis Collection					Carries w+mC marker and FRT site.
genetic reagent (in whole organism)	D. melanogaster	PBac{RB}Sin1[e03756]	Harvard Exelixis Collection					w1118; PBac{RB}Sin1[e03756]
genetic reagent (in whole organism)	D. melanogaster	mCherry RNAi	Bloomington Drosophila Stock Center			BDSC Cat# 35785		y1 sc v1 sev21; P{y+t7.7 v+t1.8=VALIUM20-mCherry}attP2
genetic reagent (in whole organism)	D. melanogaster	hsFLP	Bloomington Drosophila Stock Center			BDSC Cat# 6		P{ry[+t7.2]=hsFLP}1, w[1118]; Adv[1]/CyO
genetic reagent (in whole organism)	D. melanogaster	CG5003[f02616]	Bloomington Drosophila Stock Center			BDSC Cat# 18566		w1118; PBac{w+mC=WH}CG5003[f02616]/TM6B, Tb1
genetic reagent (in whole organism)	D. melanogaster	nebu[mi]	Bloomington Drosophila Stock Center			BDSC Cat# 37000		y1 w*; Mi{y+mDint2=MIC}CG10960[MI03549]/TM3, Sb, Ser
genetic reagent (in whole organism)	D. melanogaster	nebu[mb]	Bloomington Drosophila Stock Center			BDSC Cat# 24047		w1118; Mi{GFPE.3xP3=ET1}CG10960[MB03129]/TM3, Sb
genetic reagent (in whole organism)	D. melanogaster	nebu[7]		this paper			Progenitors: vas-Cas9 strain transformed with pHD_dsRED_HA_nebu_donor, pU6-BbsI_5UTR_gRNA9:21, and pU6-BbsI_exon_gRNA	w1118;; nebu[7]{dsRed}/TM3,Sb, Ser
genetic reagent (in whole organism)	D. melanogaster	CG7777[del]		this paper			Progenitors: vas-Cas9 strain transformed with pHD_dsRED_cg7777_del_donor, pU6-BbsI_3UTR_cg7777_gRNA, and pU6-BbsI_exon_cg7777_gRNA	w1118; CG7777[del]{dsRed}/Cyo
genetic reagent (in whole organism)	D. melanogaster	nebu RNAi #1	Bloomington Drosophila Stock Center			BDSC Cat# 34598		y1 v1; P{TRiP.GLC01803}attP40
genetic reagent (in whole organism)	D. melanogaster	nebu RNAi #2	Bloomington Drosophila Stock Center			BDSC Cat# 51744		y1 sc* v1 sev21; P{TRiP.HMS01072}attP2
genetic reagent (in whole organism)	D. melanogaster	CG5003 RNAi	Bloomington Drosophila Stock Center			VDRC Cat# v26680		w1118; P{GD11500}v26679
genetic reagent (in whole organism)	D. melanogaster	CG7777 RNAi	Bloomington Drosophila Stock Center			BDSC Cat# 44464		y1 sc* v1 sev21; P{TRiP.GLC01619}attP2
genetic reagent (in whole organism)	D. melanogaster	CG7777 RNAi	Bloomington Drosophila Stock Center			BDSC Cat# 50695		y1 v1; P{TRiP.HMC03097}attP40
genetic reagent (in whole organism)	D. melanogaster	Df(3R)98B5-6 (CG5003 genomic deficiency)		this paper			Progenitors: PBac{RB}Sin1[e03756]; PBac{WH}f01095	Precise deletion generated by FLP/FRP recombination. Genotype: w1118;; Df(3R)98B5-6{w[+mC]}/TM3, Sb
genetic reagent (in whole organism)	D. melanogaster	Df(2R)BSC231 (CG7777 genomic deficiency)	Bloomington Drosophila Stock Center			BDSC Cat#25719		w1118; Df(2R)BSC231/CyO
antibody	NA	rat anti-TUB (YOL1/34 )	AbD Serotec					Use at 1:1000 for imaging
antibody	NA	Alexa 488 secondaries	Molecular Probes
other	NA	glucose oxidase kit	Sigma			Cat.# GAGO20-1kt
other	NA	amyloglucosidase	Sigma			Cat.# 1602
recombinant DNA reagent	NA	pU6-BbsI-gRNA (gRNA vector)		Gratz et al. 2014 (PMID: 24478335)
recombinant DNA reagent	NA	pHD-dsRED (donor vector)		Gratz et al. 2014 (PMID: 24478335)
recombinant DNA reagent	NA	pHD_dsRED_HA_nebu_donor		this paper			Progenitors: Homology arm PCR; pHD-dsRED	Donor plasmid for insertion of selectable marker in nebu deletion line.
recombinant DNA reagent	NA	pU6-BbsI_5UTR_gRNA		this paper			Progenitors: gRNA oligo; pU6-BbsI	gRNA plasmid used in generating nebu deletion.
recombinant DNA reagent	NA	pU6-BbsI_exon_gRNA		this paper			Progenitors: gRNA oligo; pU6-BbsI	gRNA plasmid used in generating nebu deletion.
	NA	pHD_dsRED_cg7777_del_donor		this paper			Progenitors: Homology arm PCR; pHD-dsRED	Donor plasmid for insertion of selectable marker in CG7777 deletion line.
	NA	pU6-BbsI_3UTR_cg7777_gRNA		this paper			Progenitors: gRNA oligo; pU6-BbsI	gRNA plasmid used in generating CG7777 deletion.
recombinant DNA reagent	NA	pU6-BbsI_exon_cg7777_gRNA		this paper			Progenitors: gRNA oligo; pU6-BbsI	gRNA plasmid used in generating CG7777 deletion.
